# Supplementary material
Source: ML conference proceedings conference paper supplement (https://proceedings.neurips.cc/paper_files/paper/2012/hash/d1f491a404d6854880943e5c3cd9ca25-Abstract.html)
Supplement: Supplementary file 2 [file d1f491a404d6854880943e5c3cd9ca25-Supplemental.zip]

Archive with 1 entries (1 files):
- supplementary.pdf
